# Supplementary material for: Chiroptical, linear, and second-order nonlinear optical properties of tetrathiafulvalenylallene: a multifunctional molecular material
Source: Royal Society of Chemistry journal article supplement (doi:10.1039/c2tc00413e), 2012-12-13
Supplement: c2tc00413e.pdf [file c2tc00413e.pdf]

# Chiroptical, Linear, and Quadratic Nonlinear Optical Properties of the Tetrathiafulvalenylallene: Multifunctional Molecular Material

*Yanling Si<sup>a,b</sup>, Guochun Yang<sup>\*a</sup>, Zhongmin Su<sup>\*a</sup>*

<sup>a</sup> Institute of Functional Material Chemistry, Faculty of Chemistry, Northeast Normal University, Changchun, 130024 Jilin, China

<sup>b</sup> College of Resource and Environmental Science, Jilin Agricultural University, Changchun, 130118 Jilin, China

AUTHOR EMAIL ADDRESS: yanggc468@nenu.edu.cn; zmsu@nenu.edu.cn

## Contents

1. The calculated bond length (in Å) in both neutral state and the cation states and the BLA values S3
2. The calculated dipole moment ( $\mu$ , Debye) of the studied compound in neutral and cationic states. S3
3. Dependence of the dipole moment on the inverse of the BLA value ( $\Delta r$ ). S4
4. Table S3. Computed absorption energy (nm) and oscillators strengths ( $f$ ) using B3LYP functional at different basis sets level for compound **1** S4
5. Computed absorption energy (nm) and oscillators strengths ( $f$ ) using different functionals at 6-311++G(2d,2p) basis set level for compound **1** S4
6. Calculated UV-Vis (left) and ECD (right) spectra of compound **1** using CAM-B3LYP, PBE0, and B3LYP functionals at the 6-311++G(2d,2p) basis set level along with experimental UV-Vis and ECD (red dash line). S6
7. The calculated excitation energies, oscillator strengths and rotational strengths for the neutral state in the gas phase at the B3LYP/6-311++G(2d,2p) level. S6
8. Molecular orbital isosurfaces involved in the main electron transitions of the cationic states **1**<sup>2+</sup> and **1**<sup>4+</sup> at the TDB3LYP/6-311++G(2d,2p) level of theory. S10
9. The optimized structure of compound **2** S11
10. Calculated UV-Vis (left) and CD (right) spectra in solution phases of **1**, **1**<sup>2+</sup>, and **1**<sup>4+</sup> at the TDB3LYP/6-311++G(2d,2p) level of theory along with experimental UV-Vis and CD (red dash line). S12
11. The optimized molecular geometry of the reference compound. S12

|                                                                                                 |     |
|-------------------------------------------------------------------------------------------------|-----|
| 12. Dependence of the first hyperpolarizability on the inverse of the BLA value ( $\Delta r$ ). | S13 |
| 13. Cartesian coordinates of the compound <b>1</b>                                              | S13 |
| 14. Cartesian coordinates of the compound <b>1</b> <sup>2+</sup>                                | S15 |
| 15. Cartesian coordinates of the compound <b>1</b> <sup>2+</sup>                                | S16 |
| 16. Reference                                                                                   | S18 |

**Table S1.** The calculated bond length (in Å) in both neutral state and the cation states and the BLA values.

|            | <b>1</b> | <b>1</b> <sup>2+</sup> | <b>1</b> <sup>4+</sup> |
|------------|----------|------------------------|------------------------|
| $r_a$      | 1.349    | 1.387                  | 1.420                  |
| $r_{a'}$   | 1.348    | 1.358                  | 1.368                  |
| $r_{a''}$  | 1.354    | 1.375                  | 1.421                  |
| $r_b$      | 1.781    | 1.758                  | 1.726                  |
| $r_c$      | 1.783    | 1.783                  | 1.735                  |
| $r_d$      | 1.787    | 1.762                  | 1.734                  |
| $r_e$      | 1.781    | 1.753                  | 1.741                  |
| $r_{b'}$   | 1.781    | 1.756                  | 1.731                  |
| $r_{c'}$   | 1.785    | 1.752                  | 1.738                  |
| $r_{d'}$   | 1.786    | 1.772                  | 1.717                  |
| $r_{e'}$   | 1.753    | 1.731                  | 1.766                  |
| $\Delta r$ | 0.429    | 0.385                  | 0.333                  |

**Note:**  $r_{a'}$  is close to the center of the centroid, but  $r_{a''}$  is far away of the centroid.

**Table S2** The calculated dipole moment ( $\mu$ , Debye) of the studied compound in neutral and cationic states.

|                        | $\mu$ |
|------------------------|-------|
| <b>1</b>               | 4.67  |
| <b>1</b> <sup>2+</sup> | 6.58  |
| <b>1</b> <sup>4+</sup> | 7.27  |

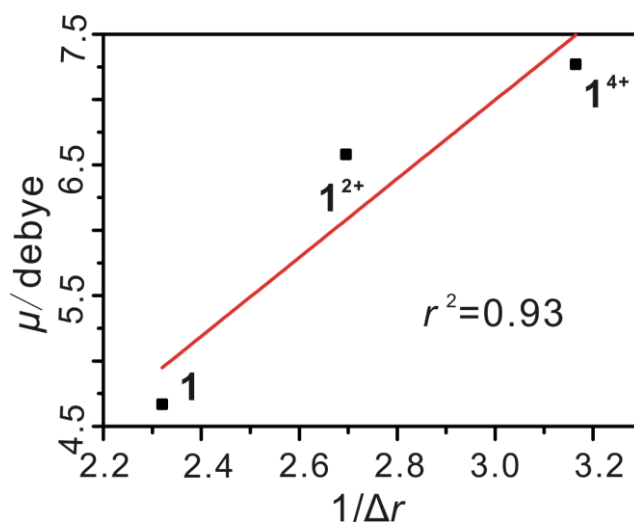

**Figure S1** Dependence of the dipole moment on the inverse of the BLA value ( $\Delta r$ ).

**Table S3.** Computed absorption energy (nm) and oscillators strengths ( $f$ ) using B3LYP functional at different basis sets level for compound **1**

| Basis set       | absorption | $f$   | absorption | $f$   |
|-----------------|------------|-------|------------|-------|
| 6-31G(d,p)      | 386.3      | 0.082 | 282.5      | 0.229 |
| 6-31G+(d)       | 394.4      | 0.082 | 287.9      | 0.177 |
| 6-311G(d,p)     | 394.8      | 0.087 | 285.8      | 0.144 |
| 6-31G++(d,p)    | 395.2      | 0.079 | 287.2      | 0.147 |
| 6-311G++(d,p)   | 397.5      | 0.077 | 288.3      | 0.127 |
| 6-311G++(2d,2p) | 404.5      | 0.084 | 275.8      | 0.137 |
| Experiment      | 404        |       | 260        |       |

**Table S4.** Computed absorption energy (nm) and oscillators strengths ( $f$ ) using different functionals at 6-311++G(2d,2p) basis set level for compound **1**

| Functionals | absorption | $f$   | absorption | $f$   |
|-------------|------------|-------|------------|-------|
| CAM-B3LYP   | 404.8      | 0.022 | 269.6      | 0.226 |
| M05-2X      | 423.3      | 0.018 | 278.2      | 0.376 |
| BH&HLYP     | 390.6      | 0.027 | 265.2      | 0.447 |

|       |       |       |       |       |
|-------|-------|-------|-------|-------|
| PBE0  | 408.0 | 0.018 | 266.7 | 0.222 |
| B3LYP | 404.5 | 0.084 | 275.8 | 0.137 |
| Exp   | 404   |       | 260   |       |

---

Here, we selected six Pople's basis sets: 6-31G(d,p), 6-31G+(d), 6-311G(d,p), 6-31G++(d,p), 6-311G++(d,p) and 6-311++G(2d,2p) to evaluate the effect of the basis set extension on the properties of electron transition by using B3LYP functional. It is noted that compound **1** exhibits an intense absorption band at 260 nm and a moderately intense absorption band at 404 nm measured by Hasegawa et al.<sup>18</sup> The calculated results at the different basis sets level were listed in Table 1. On this table, the calculated absorption wavelengths become much closer to the experimental ones with increasing the basis set size. Moreover, the relative strength of the two absorption bands are reproduced by the selected basis sets. Jacquemin and Adamo found that diffuse functions are necessary to obtain correct vertical transition energies and 6-311++G(2d,2p) basis set give the best results for their studied compounds.<sup>1</sup> Thus, 6-311++G(2d,2p) basis set was used in the following calculation. Likewise, five DFT functionals: CAM-B3LYP,<sup>2</sup> M05-2X,<sup>3</sup> BH&HLYP,<sup>4</sup> PBE0,<sup>5</sup> and B3LYP,<sup>6</sup> were selected to assess the effect of DFT functionals on the computed properties. These functionals have exhibited good performance in predicting the electron transition for organic compounds. In Table 2, we listed the absorption energy and oscillators strengths of these functionals. It is interesting to find that the absorption energy data computed with CAM-B3LYP, PBE0, and B3LYP are similar and closer to the experimental ones. However, the performance of M05-2X and BH&HLYP is not good for our studied compound. To further test the performance of CAM-B3LYP,

PBE0, and B3LYP functionals on UV-Vis/CD spectra, their simulated spectra were shown in Figure S3. The spectra simulated by PBE0 and B3LYP are good agreement with the experimental ones and better than these of CAM-B3LYP. B3LYP functional has been widely used to simulate the ECD spectra and assign absolute configurations. So, the results of B3LYP functional combined with 6-311++G(2d,2p) basis set were used in this paper.

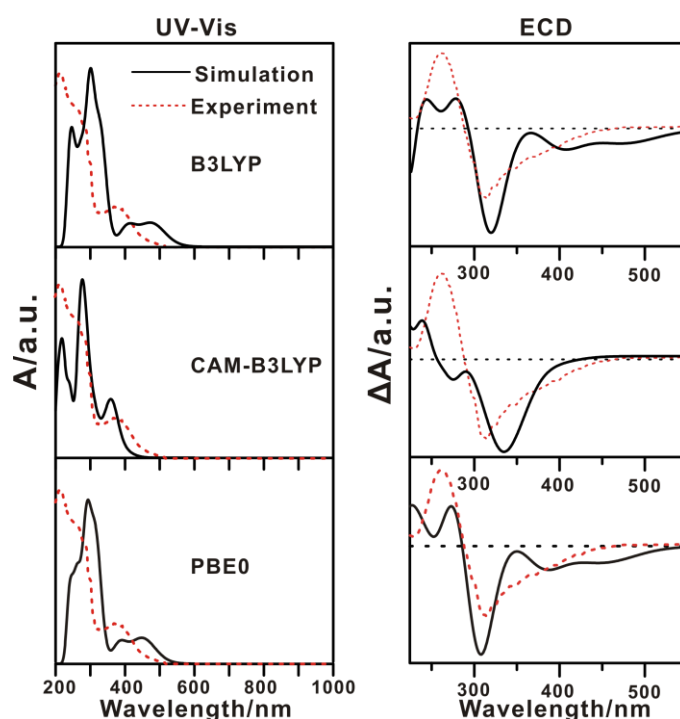

**Figure S2.** Calculated UV-Vis (left) and ECD (right) spectra of compound **1** using CAM-B3LYP, PBE0, and B3LYP functionals at the 6-311++G(2d,2p) basis set level along with experimental UV-Vis and ECD (red dash line).

**Table S5.** The Calculated excitation energies, oscillator strengths and rotational strengths for the neutral state in the gas phase at the B3LYP/ 6-311++G(2d,2p) level.

| states | eV | $\lambda^a$ | $f^b$ | Rlength <sup>c</sup> | Rvelocity <sup>c</sup> |
|--------|----|-------------|-------|----------------------|------------------------|
|--------|----|-------------|-------|----------------------|------------------------|

---

|    |        |        |        |           |           |
|----|--------|--------|--------|-----------|-----------|
| 1  | 2.5484 | 486.53 | 0.0139 | 32.3298   | 32.9941   |
| 2  | 2.5502 | 486.17 | 0.0753 | -115.6311 | -112.6302 |
| 3  | 2.7311 | 453.97 | 0.0428 | -12.4941  | -14.8339  |
| 4  | 2.7331 | 453.65 | 0.0023 | -9.6141   | -9.1218   |
| 5  | 2.9004 | 427.47 | 0.0213 | 53.3427   | 51.6782   |
| 6  | 2.9066 | 426.56 | 0.0013 | -57.1453  | -54.5661  |
| 7  | 3.0649 | 404.53 | 0.0835 | -214.4723 | -213.6357 |
| 8  | 3.1175 | 397.71 | 0.0130 | 112.4199  | 112.8798  |
| 9  | 3.2913 | 376.71 | 0.0026 | -6.7786   | -6.7903   |
| 10 | 3.2954 | 376.23 | 0.0012 | 7.2690    | 7.3160    |
| 11 | 3.3284 | 372.50 | 0.0000 | -0.1400   | -0.2118   |
| 12 | 3.3293 | 372.40 | 0.0026 | 5.2453    | 5.1555    |
| 13 | 3.6167 | 342.81 | 0.0026 | -14.7222  | -14.3569  |
| 14 | 3.6233 | 342.19 | 0.0147 | 32.9122   | 32.9835   |
| 15 | 3.7136 | 333.86 | 0.0017 | -1.6325   | -1.5993   |
| 16 | 3.7198 | 333.31 | 0.0126 | 27.7771   | 27.4815   |
| 17 | 3.7481 | 330.79 | 0.2083 | -356.5556 | -351.3821 |
| 18 | 3.7553 | 330.16 | 0.0189 | 62.6716   | 61.7988   |
| 19 | 3.7875 | 327.35 | 0.2414 | -281.3915 | -282.1693 |
| 20 | 3.8021 | 326.09 | 0.0005 | -0.0666   | -0.0646   |
| 21 | 3.8128 | 325.18 | 0.0106 | 9.6694    | 7.4852    |
| 22 | 3.8297 | 323.74 | 0.0043 | -2.3073   | -2.2479   |
| 23 | 3.8464 | 322.34 | 0.0043 | 11.2466   | 11.0586   |
| 24 | 3.9521 | 313.72 | 0.0855 | -8.7510   | -9.0745   |
| 25 | 3.9691 | 312.37 | 0.0044 | 15.6280   | 16.0420   |
| 26 | 3.9859 | 311.05 | 0.0051 | 55.9486   | 57.5525   |
| 27 | 4.0200 | 308.42 | 0.0352 | -13.4734  | -12.7622  |
| 28 | 4.0345 | 307.31 | 0.0300 | 25.4415   | 24.3947   |
| 29 | 4.0935 | 302.88 | 0.0060 | 17.0668   | 16.8096   |
| 30 | 4.0983 | 302.53 | 0.0005 | 0.8876    | 0.7653    |
| 31 | 4.1570 | 298.26 | 0.3653 | -443.4723 | -439.9209 |
| 32 | 4.1765 | 296.86 | 0.1279 | 268.5751  | 260.9055  |
| 33 | 4.1908 | 295.85 | 0.1525 | -126.2728 | -123.1978 |
| 34 | 4.2022 | 295.05 | 0.0651 | 341.4947  | 345.3833  |
| 35 | 4.2152 | 294.14 | 0.0008 | 17.6378   | 18.9977   |
| 36 | 4.2178 | 293.95 | 0.0130 | 15.2837   | 15.0379   |
| 37 | 4.2337 | 292.85 | 0.0133 | 22.8241   | 22.4052   |
| 38 | 4.2354 | 292.74 | 0.0026 | -33.3136  | -29.8663  |
| 39 | 4.2916 | 288.90 | 0.0033 | -15.0654  | -14.4377  |
| 40 | 4.2957 | 288.63 | 0.0049 | 16.8593   | 16.7948   |
| 41 | 4.3105 | 287.63 | 0.0001 | -9.2578   | -7.9355   |
| 42 | 4.3130 | 287.47 | 0.0108 | 0.7634    | 0.6906    |
| 43 | 4.3190 | 287.07 | 0.0022 | 24.6816   | 25.7676   |
| 44 | 4.3210 | 286.93 | 0.0131 | -6.6289   | -6.2168   |

---

---

|    |        |        |        |          |          |
|----|--------|--------|--------|----------|----------|
| 45 | 4.3965 | 282.01 | 0.0010 | -7.8192  | -8.6027  |
| 46 | 4.3992 | 281.83 | 0.0007 | 1.4419   | 1.2067   |
| 47 | 4.4107 | 281.10 | 0.0001 | -0.8913  | -0.8975  |
| 48 | 4.4123 | 281.00 | 0.0130 | -9.5732  | -9.2469  |
| 49 | 4.4571 | 278.17 | 0.0004 | 4.2033   | 3.6382   |
| 50 | 4.4637 | 277.76 | 0.0633 | -13.2166 | -13.4163 |
| 51 | 4.4957 | 275.78 | 0.1366 | -0.9120  | -2.1400  |
| 52 | 4.5044 | 275.25 | 0.0012 | -7.2594  | -7.1635  |
| 53 | 4.5052 | 275.20 | 0.0005 | -1.0440  | -0.9676  |
| 54 | 4.5172 | 274.47 | 0.0002 | 11.0767  | 11.3798  |
| 55 | 4.5211 | 274.23 | 0.0794 | 43.5167  | 43.4467  |
| 56 | 4.5549 | 272.20 | 0.0035 | -37.3395 | -36.5207 |
| 57 | 4.5718 | 271.19 | 0.0059 | 11.3717  | 11.4861  |
| 58 | 4.5863 | 270.33 | 0.0037 | -25.8026 | -26.6156 |
| 59 | 4.5908 | 270.07 | 0.0248 | 32.7708  | 32.7283  |
| 60 | 4.6034 | 269.33 | 0.0141 | -41.2473 | -41.3448 |
| 61 | 4.6129 | 268.78 | 0.0082 | 14.2644  | 12.8434  |
| 62 | 4.6363 | 267.42 | 0.0001 | -4.9367  | -4.4035  |
| 63 | 4.6585 | 266.15 | 0.0329 | 18.7699  | 18.0519  |
| 64 | 4.6598 | 266.07 | 0.0005 | -21.4681 | -17.8002 |
| 65 | 4.6680 | 265.60 | 0.0002 | 9.0384   | 5.6317   |
| 66 | 4.6798 | 264.93 | 0.1240 | 66.8543  | 66.7812  |
| 67 | 4.7239 | 262.46 | 0.0026 | 12.6978  | 11.3831  |
| 68 | 4.7265 | 262.31 | 0.0025 | 4.1424   | 4.1890   |
| 69 | 4.7331 | 261.95 | 0.0006 | 1.3590   | 1.1779   |
| 70 | 4.7370 | 261.74 | 0.0001 | -9.2721  | -7.7956  |
| 71 | 4.7656 | 260.17 | 0.0236 | -8.5130  | -8.4079  |
| 72 | 4.7677 | 260.05 | 0.0001 | 2.7839   | 3.3347   |
| 73 | 4.7686 | 260.00 | 0.0023 | 0.7858   | 0.6388   |
| 74 | 4.7812 | 259.32 | 0.0143 | -32.4935 | -32.5281 |
| 75 | 4.7822 | 259.26 | 0.0024 | 36.1130  | 30.2876  |
| 76 | 4.7894 | 258.87 | 0.0000 | -0.0993  | 0.7486   |
| 77 | 4.7962 | 258.50 | 0.0040 | -20.5288 | -20.4824 |
| 78 | 4.8100 | 257.76 | 0.0005 | 12.3135  | 13.1911  |
| 79 | 4.8372 | 256.32 | 0.0113 | 22.8298  | 22.3772  |
| 80 | 4.8608 | 255.07 | 0.0140 | 40.7280  | 40.5576  |
| 81 | 4.8646 | 254.87 | 0.0178 | -55.3431 | -52.8228 |
| 82 | 4.8687 | 254.66 | 0.0064 | -30.0589 | -31.2185 |
| 83 | 4.8712 | 254.53 | 0.0076 | 18.7462  | 18.5381  |
| 84 | 4.8850 | 253.81 | 0.0068 | -5.4186  | -5.2514  |
| 85 | 4.8939 | 253.34 | 0.0049 | -11.4086 | -10.7786 |
| 86 | 4.9006 | 253.00 | 0.0208 | -2.5864  | -2.6696  |
| 87 | 4.9022 | 252.92 | 0.0183 | 14.5977  | 14.6074  |
| 88 | 4.9273 | 251.63 | 0.0805 | 45.8110  | 46.4261  |

---



---

|     |        |        |        |          |          |
|-----|--------|--------|--------|----------|----------|
| 89  | 4.9615 | 249.89 | 0.0159 | -29.7517 | -29.4794 |
| 90  | 4.9706 | 249.44 | 0.0055 | -3.0359  | -3.3126  |
| 91  | 4.9746 | 249.23 | 0.0299 | 85.7216  | 81.0855  |
| 92  | 4.9912 | 248.41 | 0.0150 | 0.8710   | 0.8917   |
| 93  | 4.9947 | 248.23 | 0.0005 | -6.1979  | -4.9227  |
| 94  | 4.9984 | 248.05 | 0.0049 | 27.4791  | 27.7791  |
| 95  | 5.0019 | 247.87 | 0.0047 | -2.0222  | -2.5757  |
| 96  | 5.0213 | 246.92 | 0.0072 | 31.5876  | 31.2333  |
| 97  | 5.0224 | 246.86 | 0.0001 | -4.5812  | -3.7348  |
| 98  | 5.0227 | 246.85 | 0.0003 | 1.0608   | 1.1087   |
| 99  | 5.0308 | 246.45 | 0.0024 | -11.5192 | -11.1395 |
| 100 | 5.0310 | 246.44 | 0.0037 | 14.2987  | 13.6141  |
| 101 | 5.0325 | 246.36 | 0.0000 | 1.4602   | 1.4725   |
| 102 | 5.0504 | 245.49 | 0.0060 | -11.5183 | -11.8582 |
| 103 | 5.0635 | 244.86 | 0.0358 | 15.7748  | 15.7230  |
| 104 | 5.0777 | 244.18 | 0.0585 | 3.3649   | 3.4726   |
| 105 | 5.0794 | 244.09 | 0.0007 | -8.5727  | -8.8885  |
| 106 | 5.1023 | 243.00 | 0.0157 | 24.1988  | 24.3356  |
| 107 | 5.1037 | 242.93 | 0.0019 | 27.4478  | 28.0605  |
| 108 | 5.1131 | 242.48 | 0.0004 | 0.6177   | 0.6721   |
| 109 | 5.1135 | 242.46 | 0.0125 | -50.2283 | -48.1091 |
| 110 | 5.1180 | 242.25 | 0.0064 | -29.8715 | -30.5754 |
| 111 | 5.1472 | 240.88 | 0.0055 | 17.2787  | 17.2086  |
| 112 | 5.1474 | 240.87 | 0.0467 | 11.1596  | 10.9485  |
| 113 | 5.1494 | 240.78 | 0.0033 | -1.3696  | -1.3785  |
| 114 | 5.1564 | 240.45 | 0.0181 | 13.2677  | 13.4334  |
| 115 | 5.1583 | 240.36 | 0.0320 | -73.1446 | -72.9510 |
| 116 | 5.1669 | 239.96 | 0.0346 | -25.5944 | -25.2737 |
| 117 | 5.1786 | 239.42 | 0.0139 | -24.5834 | -24.8973 |
| 118 | 5.1849 | 239.13 | 0.0347 | -35.0354 | -35.7156 |
| 119 | 5.1918 | 238.81 | 0.0003 | 4.1806   | 4.0794   |
| 120 | 5.1929 | 238.76 | 0.0110 | -3.3800  | -3.5369  |
| 121 | 5.2069 | 238.12 | 0.0103 | -70.8779 | -71.3095 |
| 122 | 5.2073 | 238.10 | 0.0080 | 0.9910   | 0.7825   |
| 123 | 5.2141 | 237.78 | 0.0013 | -10.8294 | -9.7935  |
| 124 | 5.2162 | 237.69 | 0.0339 | 25.6424  | 24.9982  |
| 125 | 5.2396 | 236.63 | 0.0032 | 3.2572   | 3.9148   |
| 126 | 5.2432 | 236.47 | 0.0079 | -16.5958 | -14.5375 |
| 127 | 5.2587 | 235.77 | 0.0073 | 7.0394   | 7.1914   |
| 128 | 5.2704 | 235.25 | 0.0199 | 37.0927  | 37.3277  |
| 129 | 5.2787 | 234.88 | 0.0067 | 9.3691   | 9.5280   |
| 130 | 5.2847 | 234.61 | 0.0306 | -30.2070 | -30.0283 |
| 131 | 5.2898 | 234.39 | 0.0061 | -14.0198 | -14.0938 |
| 132 | 5.3048 | 233.72 | 0.0000 | -0.4194  | -0.3758  |

---

|     |        |        |        |          |          |
|-----|--------|--------|--------|----------|----------|
| 133 | 5.3069 | 233.63 | 0.0064 | -15.1962 | -14.7754 |
| 134 | 5.3095 | 233.51 | 0.0003 | 2.4339   | 3.4482   |
| 135 | 5.3137 | 233.33 | 0.0056 | -10.7881 | -10.6136 |
| 136 | 5.3193 | 233.09 | 0.0006 | 2.3218   | 2.0097   |
| 137 | 5.3233 | 232.91 | 0.0005 | -1.2466  | -1.6328  |
| 138 | 5.3249 | 232.84 | 0.0055 | 1.4243   | 1.4699   |
| 139 | 5.3385 | 232.25 | 0.0003 | -0.3726  | -0.4291  |
| 140 | 5.3415 | 232.11 | 0.0157 | -32.8992 | -33.7209 |
| 141 | 5.3474 | 231.86 | 0.0066 | 8.6208   | 8.5773   |
| 142 | 5.3514 | 231.68 | 0.0216 | -12.1307 | -12.0073 |
| 143 | 5.3610 | 231.27 | 0.0038 | 3.5764   | 3.8452   |
| 144 | 5.3611 | 231.27 | 0.0004 | 2.4638   | 2.8351   |
| 145 | 5.3654 | 231.08 | 0.0018 | 8.0943   | 8.0957   |
| 146 | 5.3843 | 230.27 | 0.0106 | 42.2503  | 42.8001  |
| 147 | 5.3977 | 229.70 | 0.0149 | -15.5287 | -15.0056 |
| 148 | 5.4009 | 229.56 | 0.0033 | 12.8083  | 13.0162  |
| 149 | 5.4127 | 229.06 | 0.0003 | -3.8770  | -4.4252  |
| 150 | 5.4148 | 228.97 | 0.0254 | -25.0266 | -24.6692 |

<sup>a</sup> $\lambda$  in nm. <sup>b</sup> Oscillator Strengths. <sup>c</sup> R values (in  $10^{-40}$  esu<sup>2</sup>cm<sup>2</sup>) using the velocity-gauge representation and length-gauge representation of the electric dipole operator.

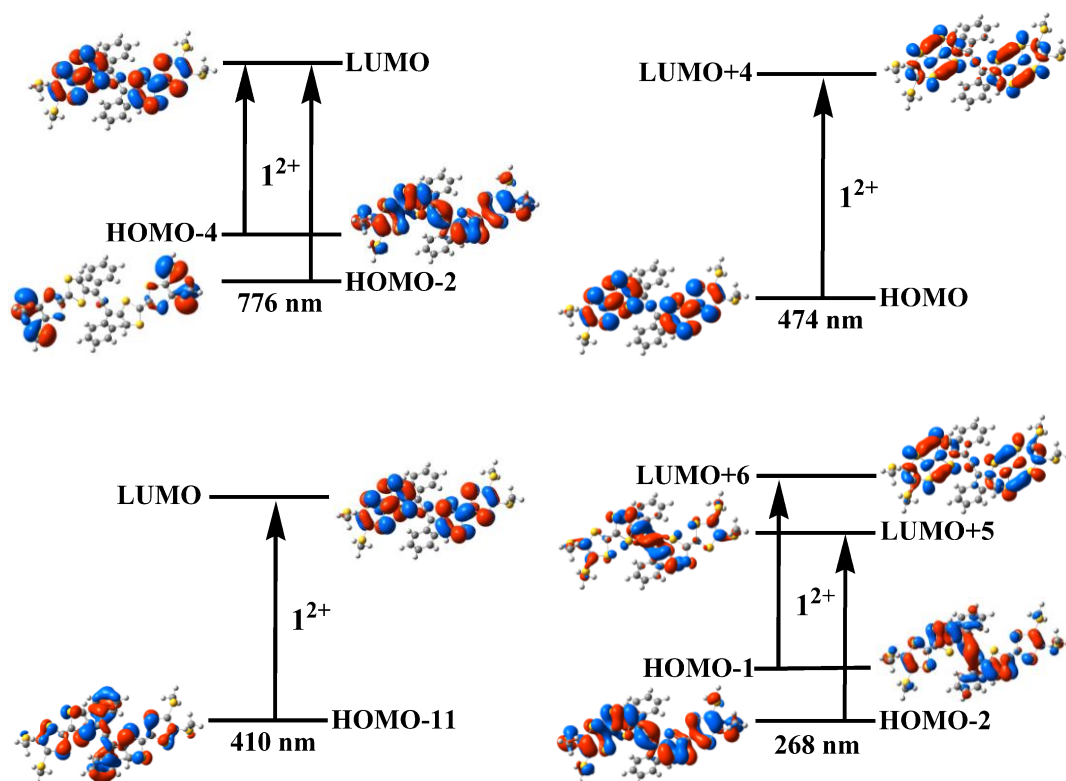

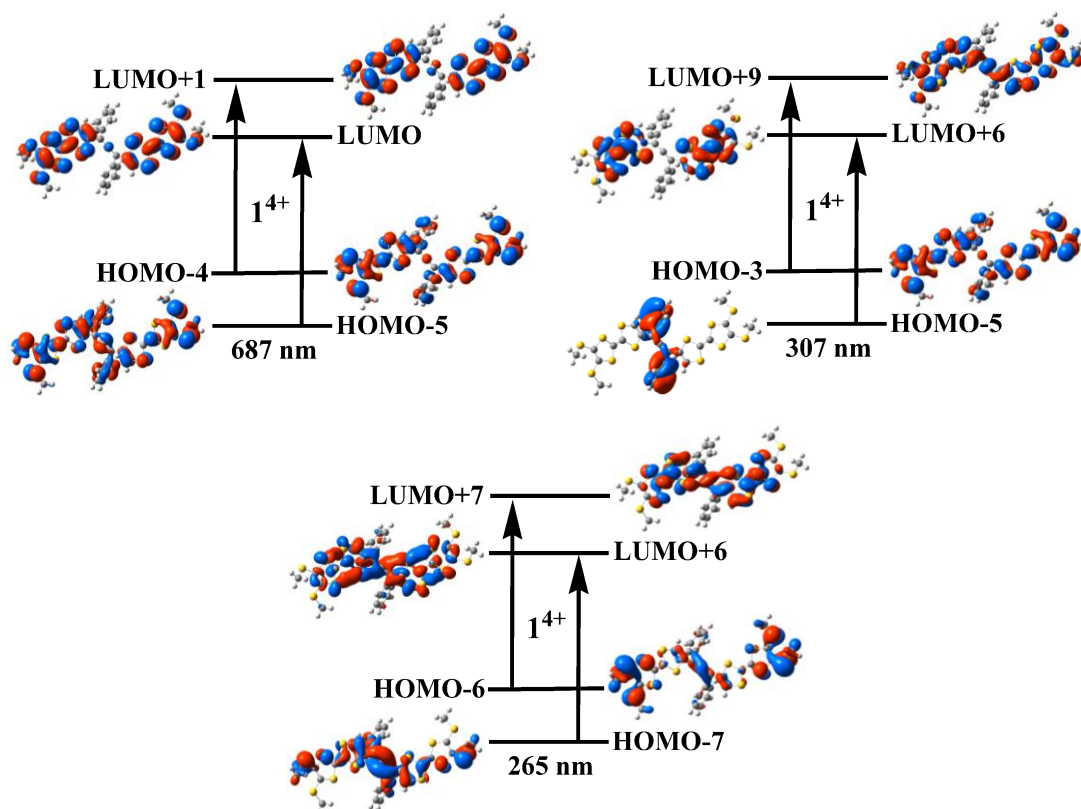

**Figure S3.** Molecular orbital isosurfaces involved in the main electron transitions of the cationic states  $1^{2+}$  and  $1^{4+}$  at the TDB3LYP/6-311++G(2d,2p) level of theory.

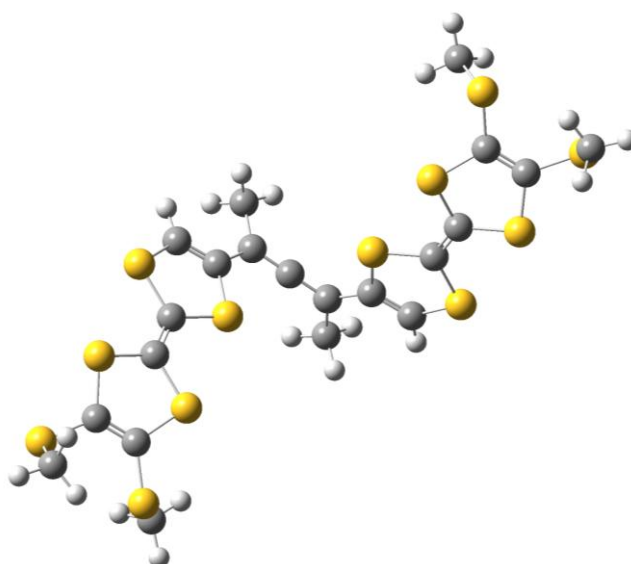

**Figure S4.** The optimized structure of compound 2.

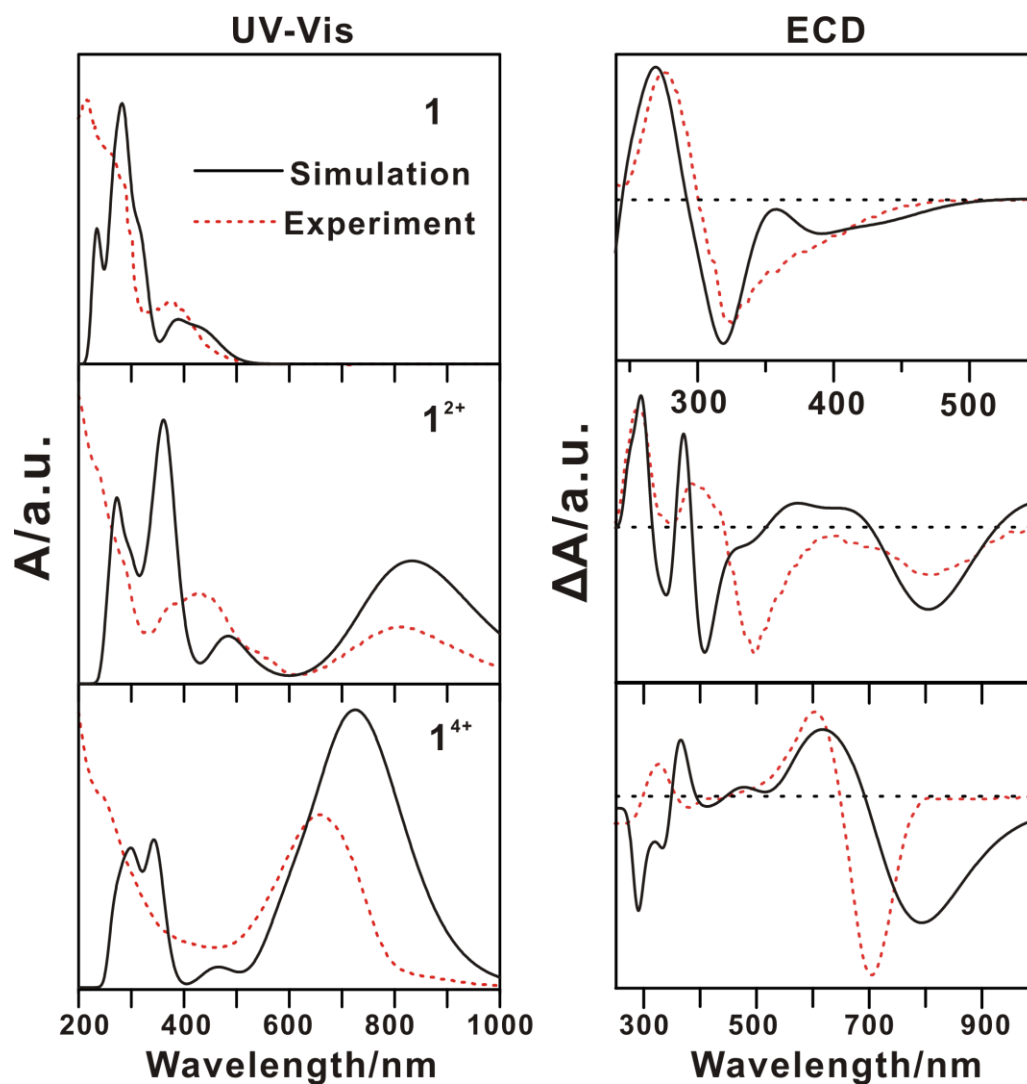

**Figure S5.** Calculated UV-Vis (left) and ECD (right) spectra in solution phases of **1**, **1<sup>2+</sup>**, and **1<sup>4+</sup>** at the TDB3LYP/6-311++G(2d,2p) level of theory along with experimental UV-Vis and ECD (red dash line). Data to prepare the experimental ECD spectra were taken from ref 17.

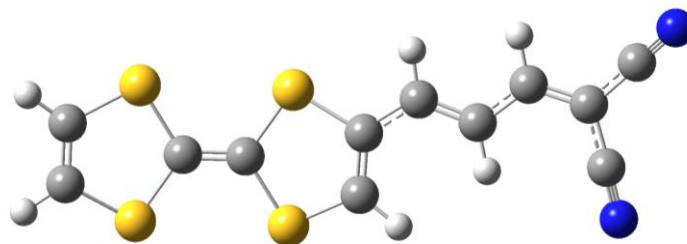

**Figure S6.** The optimized molecular geometry of the reference compound.

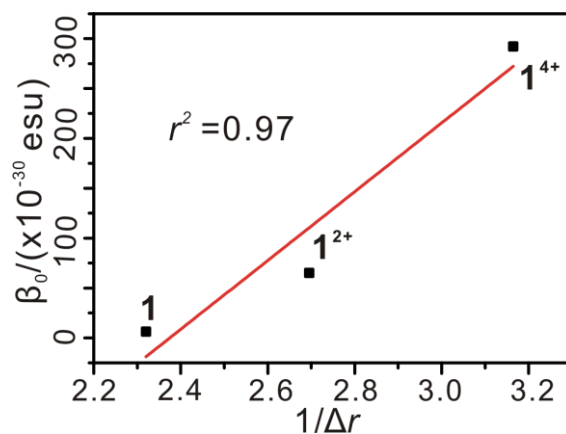

**Figure. S7** Dependence of the first hyperpolarizability on the inverse of the BLA value ( $\Delta r$ ).

**Table S6.** Cartesian Coordinates of **1** (B3LYP/6-31G\*\*)

| Center Number | Atomic Number | Atomic Type | Coordinates (Angstroms) |           |          |
|---------------|---------------|-------------|-------------------------|-----------|----------|
|               |               |             | x                       | y         | z        |
| 1             | 6             | 0           | 0.000000                | 0.000000  | 2.021863 |
| 2             | 6             | 0           | -1.127505               | 0.681034  | 2.053392 |
| 3             | 6             | 0           | 1.127505                | -0.681034 | 2.053392 |
| 4             | 6             | 0           | 2.221424                | -0.262468 | 2.993677 |
| 5             | 6             | 0           | 2.777747                | 1.018214  | 2.909586 |
| 6             | 6             | 0           | 2.676473                | -1.139704 | 3.986508 |
| 7             | 6             | 0           | 3.774970                | 1.413074  | 3.799455 |
| 8             | 1             | 0           | 2.428442                | 1.701514  | 2.144276 |
| 9             | 6             | 0           | 3.670436                | -0.740888 | 4.87697  |
| 10            | 1             | 0           | 2.240290                | -2.128701 | 4.069107 |
| 11            | 6             | 0           | 4.224497                | 0.535505  | 4.784172 |
| 12            | 1             | 0           | 4.201037                | 2.407033  | 3.720876 |
| 13            | 1             | 0           | 4.007785                | -1.425735 | 5.646986 |
| 14            | 1             | 0           | 4.999455                | 0.843912  | 5.476798 |
| 15            | 6             | 0           | -2.221424               | 0.262468  | 2.993677 |
| 16            | 6             | 0           | -2.777747               | -1.018214 | 2.909586 |
| 17            | 6             | 0           | -2.676473               | 1.139704  | 3.986508 |
| 18            | 6             | 0           | -3.774970               | -1.413074 | 3.799455 |
| 19            | 1             | 0           | -2.428442               | -1.701514 | 2.144276 |
| 20            | 6             | 0           | -3.670436               | 0.740888  | 4.87697  |
| 21            | 1             | 0           | -2.240290               | 2.128701  | 4.069107 |

---

|    |    |   |           |           |          |
|----|----|---|-----------|-----------|----------|
| 22 | 6  | 0 | -4.224497 | -0.535505 | 4.784172 |
| 23 | 1  | 0 | -4.201037 | -2.407033 | 3.720876 |
| 24 | 1  | 0 | -4.007785 | 1.425735  | 5.646986 |
| 25 | 1  | 0 | -4.999455 | -0.843912 | 5.476798 |
| 26 | 6  | 0 | -2.516562 | 2.489478  | 1.002894 |
| 27 | 1  | 0 | -3.433087 | 2.237172  | 1.517091 |
| 28 | 6  | 0 | -0.848504 | 3.809050  | -0.48927 |
| 29 | 6  | 0 | 2.516562  | -2.489478 | 1.002894 |
| 30 | 6  | 0 | 0.848504  | -3.809050 | -0.48927 |
| 31 | 1  | 0 | 3.433087  | -2.237172 | 1.517091 |
| 32 | 6  | 0 | 1.353435  | -1.835544 | 1.171412 |
| 33 | 6  | 0 | -1.353435 | 1.835544  | 1.171412 |
| 34 | 16 | 0 | -2.600251 | 3.797334  | -0.15915 |
| 35 | 16 | 0 | 0.000000  | 2.376703  | 0.140016 |
| 36 | 16 | 0 | 0.000000  | -2.376703 | 0.140016 |
| 37 | 16 | 0 | 2.600251  | -3.797334 | -0.15915 |
| 38 | 6  | 0 | -1.586445 | -6.573266 | -1.81035 |
| 39 | 6  | 0 | -0.406236 | -7.209211 | -1.97508 |
| 40 | 6  | 0 | 0.406236  | 7.209211  | -1.97508 |
| 41 | 6  | 0 | 1.586445  | 6.573266  | -1.81035 |
| 42 | 16 | 0 | 1.512637  | 4.812289  | -1.52129 |
| 43 | 16 | 0 | -1.066584 | 6.222101  | -1.83026 |
| 44 | 16 | 0 | 1.066584  | -6.222101 | -1.83026 |
| 45 | 16 | 0 | -1.512637 | -4.812289 | -1.52129 |
| 46 | 6  | 0 | -0.230607 | 4.795902  | -1.16574 |
| 47 | 6  | 0 | 0.230607  | -4.795902 | -1.16574 |
| 48 | 16 | 0 | -0.131735 | -8.927392 | -2.31816 |
| 49 | 16 | 0 | -3.189516 | -7.294743 | -1.99305 |
| 50 | 16 | 0 | 3.189516  | 7.294743  | -1.99305 |
| 51 | 16 | 0 | 0.131735  | 8.927392  | -2.31816 |
| 52 | 6  | 0 | 0.768104  | 9.078761  | -4.03303 |
| 53 | 1  | 0 | 1.850508  | 8.966290  | -4.05414 |
| 54 | 1  | 0 | 0.287269  | 8.347578  | -4.68135 |
| 55 | 1  | 0 | 0.497729  | 10.084395 | -4.35871 |
| 56 | 6  | 0 | 3.767725  | 7.311515  | -0.24983 |
| 57 | 1  | 0 | 3.143026  | 7.974382  | 0.347171 |
| 58 | 1  | 0 | 3.767786  | 6.304801  | 0.165503 |
| 59 | 1  | 0 | 4.788867  | 7.693826  | -0.27749 |
| 60 | 6  | 0 | -0.768104 | -9.078761 | -4.03303 |
| 61 | 1  | 0 | -1.850508 | -8.966290 | -4.05414 |
| 62 | 1  | 0 | -0.287269 | -8.347578 | -4.68135 |
| 63 | 1  | 0 | -0.497729 | 10.084395 | -4.35871 |
| 64 | 6  | 0 | -3.767725 | -7.311515 | -0.24983 |
| 65 | 1  | 0 | -3.143026 | -7.974382 | 0.347171 |

---

|    |   |   |           |           |          |
|----|---|---|-----------|-----------|----------|
| 66 | 1 | 0 | -3.767786 | -6.304801 | 0.165503 |
| 67 | 1 | 0 | -4.788867 | -7.693826 | -0.27749 |

**Table S7.** Cartesian Coordinates of  $\mathbf{1}^{2+}$  (B3LYP/6-31G\*\*)

| Center Number | Atomic Number | Atomic Type | Coordinates (Angstroms) |           |          |
|---------------|---------------|-------------|-------------------------|-----------|----------|
|               |               |             | x                       | y         | z        |
| 1             | 6             | 0           | 0.000278                | -0.000002 | 2.505440 |
| 2             | 6             | 0           | -1.119562               | 0.700675  | 2.580214 |
| 3             | 6             | 0           | 1.120164                | -0.700634 | 2.579816 |
| 4             | 6             | 0           | 2.197281                | -0.279771 | 3.540777 |
| 5             | 6             | 0           | 2.783347                | 0.989428  | 3.443990 |
| 6             | 6             | 0           | 2.596246                | -1.148058 | 4.569998 |
| 7             | 6             | 0           | 3.759232                | 1.382853  | 4.359026 |
| 8             | 1             | 0           | 2.480056                | 1.662078  | 2.647708 |
| 9             | 6             | 0           | 3.571510                | -0.749098 | 5.482778 |
| 10            | 1             | 0           | 2.128866                | -2.123230 | 4.669139 |
| 11            | 6             | 0           | 4.155313                | 0.515324  | 5.378310 |
| 12            | 1             | 0           | 4.212266                | 2.365599  | 4.275020 |
| 13            | 1             | 0           | 3.867638                | -1.421929 | 6.281165 |
| 14            | 1             | 0           | 4.913761                | 0.823528  | 6.090645 |
| 15            | 6             | 0           | -2.196204               | 0.280125  | 3.541817 |
| 16            | 6             | 0           | -2.781677               | -0.989448 | 3.446248 |
| 17            | 6             | 0           | -2.595283               | 1.149033  | 4.570472 |
| 18            | 6             | 0           | -3.757077               | -1.382623 | 4.361902 |
| 19            | 1             | 0           | -2.478304               | -1.662584 | 2.650409 |
| 20            | 6             | 0           | -3.570060               | 0.750322  | 5.483879 |
| 21            | 1             | 0           | -2.128355               | 2.124512  | 4.668709 |
| 22            | 6             | 0           | -4.153273               | -0.514471 | 5.380614 |
| 23            | 1             | 0           | -4.209652               | -2.365659 | 4.278819 |
| 24            | 1             | 0           | -3.866264               | 1.423648  | 6.281820 |
| 25            | 1             | 0           | -4.911349               | -0.822472 | 6.093433 |
| 26            | 6             | 0           | -2.527785               | 2.565613  | 1.654953 |
| 27            | 1             | 0           | -3.437712               | 2.260971  | 2.157007 |
| 28            | 6             | 0           | -0.919194               | 3.963436  | 0.192546 |
| 29            | 6             | 0           | 2.527805                | -2.566229 | 1.654990 |
| 30            | 6             | 0           | 0.918749                | -3.963837 | 0.192885 |
| 31            | 1             | 0           | 3.437823                | -2.261796 | 2.157006 |
| 32            | 6             | 0           | 1.346325                | -1.905404 | 1.763692 |
| 33            | 6             | 0           | -1.346073               | 1.905226  | 1.763844 |
| 34            | 16            | 0           | -2.599487               | 3.999391  | 0.688043 |
| 35            | 16            | 0           | -0.010072               | 2.603912  | 0.832544 |
| 36            | 16            | 0           | 0.010109                | -2.603799 | 0.832473 |
| 37            | 16            | 0           | 2.599025                | -4.000256 | 0.688406 |

|    |    |   |           |           |           |
|----|----|---|-----------|-----------|-----------|
| 38 | 6  | 0 | -1.299604 | -6.439697 | -1.991510 |
| 39 | 6  | 0 | -0.076879 | -7.060959 | -2.092965 |
| 40 | 6  | 0 | 0.075336  | 7.060288  | -2.094149 |
| 41 | 6  | 0 | 1.298311  | 6.439559  | -1.992417 |
| 42 | 16 | 0 | 1.336019  | 4.935629  | -1.074504 |
| 43 | 16 | 0 | -1.265205 | 6.276092  | -1.279549 |
| 44 | 16 | 0 | 1.263915  | -6.277103 | -1.278450 |
| 45 | 16 | 0 | -1.336776 | -4.935507 | -1.074005 |
| 46 | 6  | 0 | -0.363213 | 4.938086  | -0.623259 |
| 47 | 6  | 0 | 0.362426  | -4.938518 | -0.622649 |
| 48 | 16 | 0 | 0.233727  | -8.613939 | -2.875399 |
| 49 | 16 | 0 | -2.744401 | -7.118008 | -2.713841 |
| 50 | 16 | 0 | 2.742889  | 7.118243  | -2.714827 |
| 51 | 16 | 0 | -0.235889 | 8.612924  | -2.877013 |
| 52 | 6  | 0 | -0.388922 | 8.122829  | -4.647632 |
| 53 | 1  | 0 | 0.530791  | 7.662197  | -5.008002 |
| 54 | 1  | 0 | -1.245798 | 7.464531  | -4.792527 |
| 55 | 1  | 0 | -0.556993 | 9.060635  | -5.181298 |
| 56 | 6  | 0 | 4.038367  | 5.905431  | -2.276855 |
| 57 | 1  | 0 | 4.170764  | 5.837392  | -1.195042 |
| 58 | 1  | 0 | 3.838299  | 4.926127  | -2.716608 |
| 59 | 1  | 0 | 4.952013  | 6.309205  | -2.717301 |
| 60 | 6  | 0 | 0.387498  | -8.124272 | -4.646073 |
| 61 | 1  | 0 | -0.531867 | -7.663185 | -5.006751 |
| 62 | 1  | 0 | 1.244785  | -7.466489 | -4.790876 |
| 63 | 1  | 0 | 0.555168  | -9.062268 | -5.179531 |
| 64 | 6  | 0 | -4.039368 | -5.904410 | -2.276521 |
| 65 | 1  | 0 | -4.171823 | -5.835817 | -1.194750 |
| 66 | 1  | 0 | -3.838820 | -4.925396 | -2.716701 |
| 67 | 1  | 0 | -4.953163 | -6.307975 | -2.716849 |

**Table S8.** Cartesian Coordinates of  $\mathbf{1}^{4+}$  (B3LYP/6-31G\*\*)

| Center Number | Atomic Number | Atomic Type | Coordinates (Angstroms) |           |          |
|---------------|---------------|-------------|-------------------------|-----------|----------|
|               |               |             | x                       | y         | z        |
| 1             | 6             | 0           | 0.000088                | -0.000346 | 1.621397 |
| 2             | 6             | 0           | -1.043849               | 0.801341  | 1.765651 |
| 3             | 6             | 0           | 1.043857                | -0.802291 | 1.765526 |
| 4             | 6             | 0           | 2.126187                | -0.378598 | 2.728829 |
| 5             | 6             | 0           | 3.060537                | 0.599469  | 2.356940 |
| 6             | 6             | 0           | 2.197849                | -0.972562 | 3.999714 |
| 7             | 6             | 0           | 4.066140                | 0.973425  | 3.250022 |
| 8             | 1             | 0           | 3.013383                | 1.046988  | 1.367768 |
| 9             | 6             | 0           | 3.199952                | -0.585877 | 4.888646 |



---

|    |    |   |           |           |           |
|----|----|---|-----------|-----------|-----------|
| 10 | 1  | 0 | 1.467935  | -1.719897 | 4.296371  |
| 11 | 6  | 0 | 4.134691  | 0.384301  | 4.514861  |
| 12 | 1  | 0 | 4.798014  | 1.719994  | 2.959159  |
| 13 | 1  | 0 | 3.251052  | -1.039808 | 5.872910  |
| 14 | 1  | 0 | 4.915522  | 0.678460  | 5.208573  |
| 15 | 6  | 0 | -2.126767 | 0.376474  | 2.727818  |
| 16 | 6  | 0 | -3.061914 | -0.599928 | 2.353558  |
| 17 | 6  | 0 | -2.198239 | 0.967812  | 3.999923  |
| 18 | 6  | 0 | -4.068156 | -0.974801 | 3.245539  |
| 19 | 1  | 0 | -3.014845 | -1.045450 | 1.363478  |
| 20 | 6  | 0 | -3.200998 | 0.580211  | 4.887727  |
| 21 | 1  | 0 | -1.467727 | 1.713856  | 4.298352  |
| 22 | 6  | 0 | -4.136551 | -0.388267 | 4.511594  |
| 23 | 1  | 0 | -4.800643 | -1.720066 | 2.952876  |
| 24 | 1  | 0 | -3.251982 | 1.032123  | 5.872926  |
| 25 | 1  | 0 | -4.917889 | -0.683136 | 5.204434  |
| 26 | 6  | 0 | -2.447284 | 2.734941  | 1.026929  |
| 27 | 1  | 0 | -3.373730 | 2.317311  | 1.405772  |
| 28 | 6  | 0 | -0.829810 | 4.422865  | -0.045074 |
| 29 | 6  | 0 | 2.447578  | -2.735022 | 1.025011  |
| 30 | 6  | 0 | 0.830342  | -4.422041 | -0.048786 |
| 31 | 1  | 0 | 3.373950  | -2.317695 | 1.404370  |
| 32 | 6  | 0 | 1.238250  | -2.100155 | 1.095641  |
| 33 | 6  | 0 | -1.238018 | 2.099894  | 1.097052  |
| 34 | 16 | 0 | -2.515779 | 4.301849  | 0.327768  |
| 35 | 16 | 0 | 0.099067  | 3.026361  | 0.408847  |
| 36 | 16 | 0 | -0.098688 | -3.026047 | 0.406390  |
| 37 | 16 | 0 | 2.516285  | -4.301215 | 0.324271  |
| 38 | 6  | 0 | -1.279035 | -7.547988 | -1.401108 |
| 39 | 6  | 0 | 0.043093  | -7.976405 | -1.696855 |
| 40 | 6  | 0 | -0.042262 | 7.978660  | -1.689898 |
| 41 | 6  | 0 | 1.279821  | 7.549976  | -1.394324 |
| 42 | 16 | 0 | 1.406987  | 5.959815  | -0.694580 |
| 43 | 16 | 0 | -1.272204 | 6.792342  | -1.394146 |
| 44 | 16 | 0 | 1.272990  | -6.790348 | -1.399846 |
| 45 | 16 | 0 | -1.406325 | -5.958434 | -0.700017 |
| 46 | 6  | 0 | -0.286761 | 5.588046  | -0.647999 |
| 47 | 6  | 0 | 0.287417  | -5.586705 | -0.652808 |
| 48 | 16 | 0 | 0.679239  | -9.521197 | -2.179966 |
| 49 | 16 | 0 | -2.650579 | -8.569823 | -1.636677 |
| 50 | 16 | 0 | 2.651396  | 8.572032  | -1.628725 |
| 51 | 16 | 0 | -0.678336 | 9.523889  | -2.171705 |
| 52 | 6  | 0 | 0.447987  | 10.235025 | -3.444617 |
| 53 | 1  | 0 | 1.307338  | 10.723228 | -2.987594 |

---

---

|    |   |   |           |           |           |
|----|---|---|-----------|-----------|-----------|
| 54 | 1 | 0 | 0.736358  | 9.479325  | -4.175170 |
| 55 | 1 | 0 | -0.181706 | 10.986584 | -3.928203 |
| 56 | 6 | 0 | 4.045739  | 7.627251  | -0.924936 |
| 57 | 1 | 0 | 3.892379  | 7.444658  | 0.141428  |
| 58 | 1 | 0 | 4.213521  | 6.703561  | -1.484282 |
| 59 | 1 | 0 | 4.910675  | 8.282027  | -1.054737 |
| 60 | 6 | 0 | -0.446998 | 10.231252 | -3.453556 |
| 61 | 1 | 0 | -1.306380 | 10.719844 | -2.997008 |
| 62 | 1 | 0 | -0.735320 | -9.474931 | -4.183485 |
| 63 | 1 | 0 | 0.182730  | 10.982398 | -3.937737 |
| 64 | 6 | 0 | -4.045037 | -7.625685 | -0.932253 |
| 65 | 1 | 0 | -3.891949 | -7.444236 | 0.134346  |
| 66 | 1 | 0 | -4.212600 | -6.701388 | -1.490661 |
| 67 | 1 | 0 | -4.909987 | -8.280259 | -1.062978 |

---

---

(1) Jacquemin, D.; Adamo, C. *Int. J. Quantum. Chem.* **2012**, *112*, 2135-2141.

(2) Yanai, T.; Tew, D.; Handy, N. *Chem. Phys. Lett.* **2004**, *393*, 51-57.

(3) Zhao, Y.; Schultz, N. E.; Truhlar, D. G. *J. Chem. Phys.* **2005**, *123*, 161103.

(4) Becke, A. D. *J. Chem. Phys.* **1993**, *98*, 1372.

(5) Adamo, C.; Barone, V. *J. Chem. Phys.* **1999**, *110*, 6158.

(6) Becke, A. D. *J. Chem. Phys.* **1993**, *98*, 5648-5652.
